# Supplementary material for: Rational and Evolutionary Engineering Approaches Uncover a Small Set of Genetic Changes Efficient for Rapid Xylose Fermentation in Saccharomyces cerevisiae
Source: PLoS One. 2013 Feb 26;8(2):e57048. doi: 10.1371/journal.pone.0057048 (PMC3582614; doi:10.1371/journal.pone.0057048)
Supplement: Table S1 — SNPs unique to SR7e1, SR7e2, SR7e3 relative to SR7. (XLSX) [file pone.0057048.s001.xlsx]

## Sheet: Sheet1
Table S1. SNPs unique to SR7e1, SR7e2, SR7e3 relative to SR7
Strains	Reference Position	Annotations	Coding Region Change	Amino Acid Change
SR7e1	6440	Telomeric repeat
	25867	YIL169C	240G>A	No AA change
	32791	PHO13	496G>A	Gly166Arg
	56663	TUB2	328G>T	Ala110Ser
	84326	Intergenic
	95328	Intergenic
	206126	FLO1	2724T>C	No AA change
	206129	FLO1	2727A>C	No AA change
	206132	FLO1	2730G>T	No AA change
	301186	Intergenic
	301978	Intergenic
	301979	Intergenic
	304400	Intergenic
	687563	Intergenic
SR7e2	6440	Telomeric repeat
	25867	YIL169C	240G>A	No AA change
	27075	FLO9	894C>T	No AA change
	27081	FLO9	888C>T	No AA change
	27084	FLO9	885C>T	No AA change
	32791	PHO13	496G>A	Gly166Arg
	56663	TUB2	328G>T	Ala110Ser
	84326	Intergenic
	160403	ADH1	192C>T	No AA change
	193107	DOG2	439G>T	Val147Leu
	206126	FLO1	2724T>C	No AA change
	206129	FLO1	2727A>C	No AA change
	206132	FLO1	2730G>T	No AA change
	233874	Intergenic
	299708	YOL014W	16T>C	Phe6Leu
	301978	Intergenic
	301979	Intergenic
	304400	Intergenic
	585942	Intergenic
	672904	Intergenic
	687563	Intergenic
	687573	Intergenic
	942367	Replication origin
SR7e3	4	Telomeric repeat
	12	Telomeric repeat
	6440	Telomeric repeat
	27072	FLO9	897T>C	No AA change
	27075	FLO9	894C>T	No AA change
	27081	FLO9	888C>T	No AA change
	27084	FLO9	885C>T	No AA change
	33053	PHO13	758G>A	Gly253Asp
	70054	CLA4	1140A>G	No AA change
	84326	Intergenic
	160403	ADH1	192C>T	No AA change
	193107	DOG2	439G>T	Val147Leu
	299708	YOL014W	16T>C	Phe6Leu
	304397	Intergenic
	304400	Intergenic
	553859	GLG1	1090T>C	Phe364Leu
	713310	Intergenic
	942367	Replication origin
